# Supplementary material for: Cannabidiol (CBD) as an Adjunctive Therapy in Schizophrenia: A Multicenter Randomized Controlled Trial
Source: Atypon-hosted journal article supplement (doi:10.1176/appi.ajp.2017.17030325), 2017-12-15
Supplement: appi.ajp.2017.17030325.ds001.pdf [file appi.ajp.2017.17030325.ds001.pdf]

**FIGURE S1. Disposition of Patients in a Study of Adjunctive Cannabidiol in Schizophrenia**

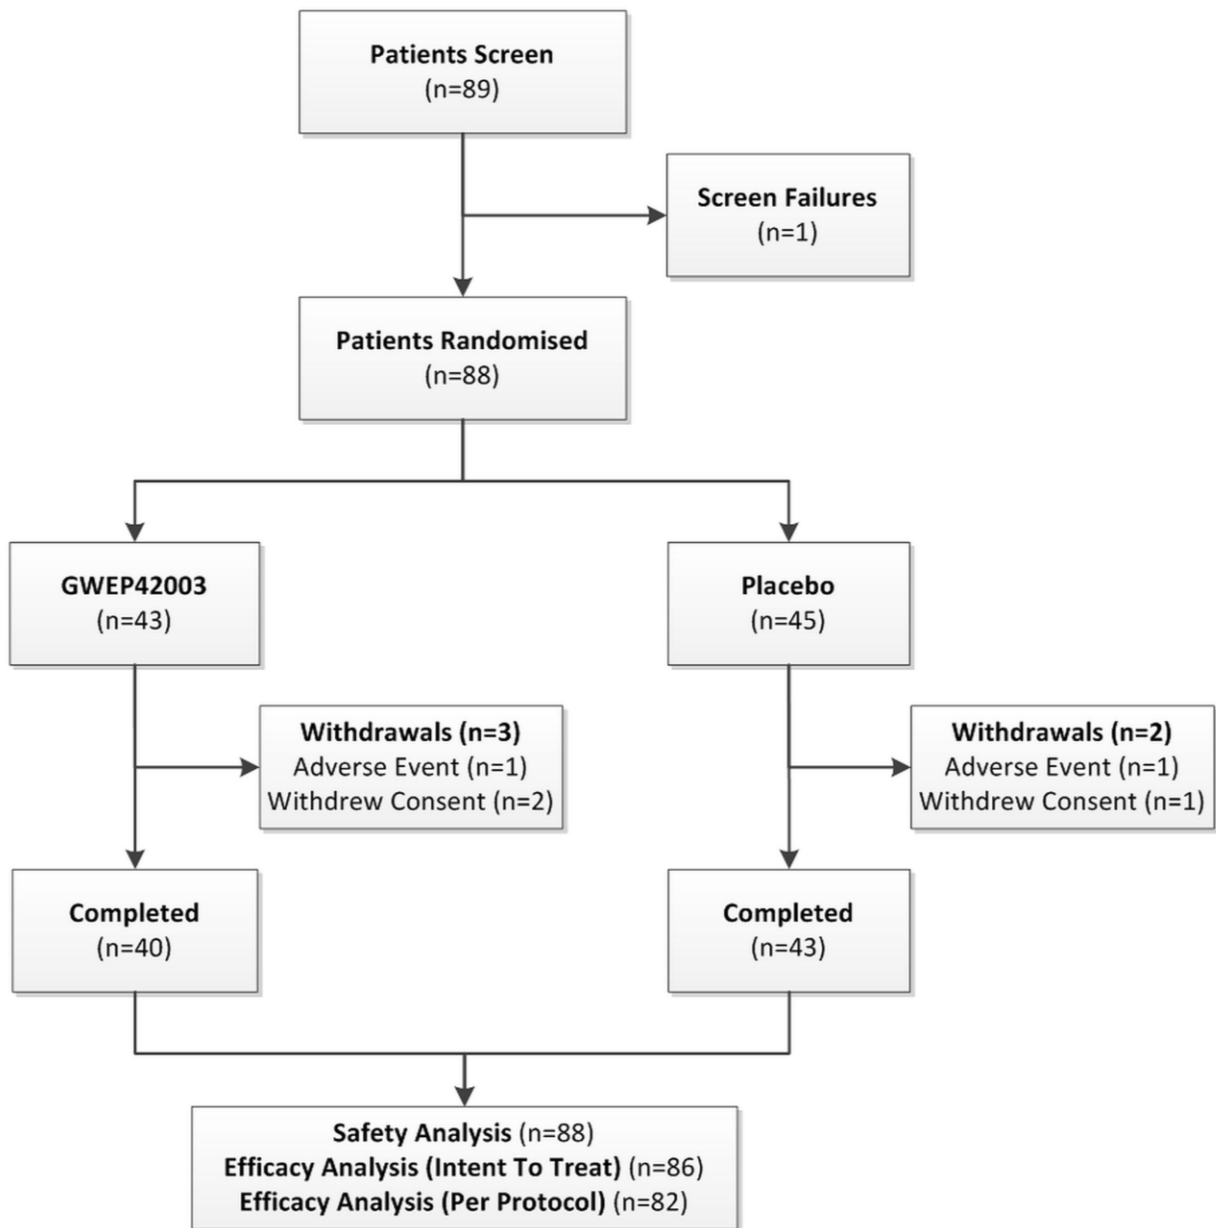

**TABLE S1. Schedule of Assessments**

| <b>Visit Number</b>                                                                   | <b>1</b> | <b>2</b> | <b>3</b>  | <b>4</b>  | <b>5</b>  |
|---------------------------------------------------------------------------------------|----------|----------|-----------|-----------|-----------|
| <b>Day Number</b>                                                                     | <b>1</b> | <b>8</b> | <b>22</b> | <b>43</b> | <b>57</b> |
| <b>Eligibility and safety measures</b>                                                |          |          |           |           |           |
| Informed consent                                                                      | X        |          |           |           |           |
| Demographics                                                                          | X        |          |           |           |           |
| Medical history                                                                       | X        |          |           |           |           |
| Physical examination                                                                  | X        |          |           | X         |           |
| ECG <sup>a</sup>                                                                      | X        |          |           | X         |           |
| Vital signs                                                                           | X        |          |           | X         |           |
| Concomitant medications review                                                        | X        | X        | X         | X         | X         |
| Pregnancy test (if applicable)                                                        | X        |          |           | X         |           |
| Randomization                                                                         | X        |          |           |           |           |
| Blood sampling and urine dipstick tests for safety measures                           | X        |          | X         | X         |           |
| Urine drug screen                                                                     | X        |          |           | X         |           |
| Investigational medicinal product dispensing                                          | X        | X        | X         |           |           |
| Investigational medicinal product compliance review                                   |          | X        | X         | X         |           |
| Adverse Events review                                                                 |          | X        | X         | X         | X         |
| <b>Efficacy measures</b>                                                              |          |          |           |           |           |
| Positive and Negative Symptoms Scale (PANSS) questionnaire                            | X        | X        | X         | X         |           |
| Scale for the Assessment of Negative Symptoms (SANS) questionnaire                    | X        | X        | X         | X         |           |
| Clinician Global Impressions Severity Scale (CGI-S)                                   | X        | X        | X         | X         |           |
| Clinician Global Impressions Improvement Scale (CGI-I)                                |          | X        | X         | X         |           |
| Blood sampling for efficacy measures and determination of cannabinoid plasma levels   | X        |          | X         | X         |           |
| Current substance abuse status (if applicable)                                        | X        |          |           |           |           |
| Global Assessment of Functioning (GAF)                                                | X        | X        | X         | X         |           |
| Simpson-Angus Scale questionnaire                                                     | X        | X        | X         | X         |           |
| Brief Assessment of Cognition in Schizophrenia (BACS) questionnaire                   | X        | X        | X         | X         |           |
| Participant Global Impression of Change of functioning and sleep (PGIC)               |          | X        | X         | X         |           |
| Caregiver Global Impression of Change of functioning and sleep (CGIC) (if applicable) |          | X        | X         | X         |           |
| Body weight, BMI, and waist measurement                                               | X        | X        | X         | X         |           |

<sup>a</sup> Additional measurements could be taken at any time during the trial, if clinically indicated.

**TABLE S2. Antipsychotic Medication Being Taken by Patients**

| Antipsychotic Medication | Patients              |      |                   |      |                 |      |
|--------------------------|-----------------------|------|-------------------|------|-----------------|------|
|                          | Cannabidiol<br>(n=43) |      | Placebo<br>(n=45) |      | Total<br>(n=88) |      |
|                          | n                     | %    | n                 | %    | n               | %    |
| Aripiprazole             | 11                    | 25.6 | 13                | 28.9 | 24              | 27.3 |
| Olanzapine               | 9                     | 20.9 | 12                | 26.7 | 21              | 23.9 |
| Risperidone              | 9                     | 20.9 | 8                 | 17.8 | 17              | 19.3 |
| Amisulpride              | 4                     | 9.3  | 4                 | 8.9  | 8               | 9.1  |
| Quetiapine               | 4                     | 9.3  | 4                 | 8.9  | 8               | 9.1  |
| Flupentixol              | 2                     | 4.7  | 2                 | 4.4  | 4               | 4.5  |
| Clozapine                | 1                     | 2.3  | 1                 | 2.2  | 2               | 2.3  |
| Zuclopentixol acetate    | 1                     | 2.2  | 1                 | 2.2  | 2               | 2.3  |
| Lithium carbonate        | 0                     |      | 1                 | 2.2  | 1               | 1.1  |
| Paliperidone             | 1                     | 2.3  | 0                 | -    | 1               | 1.1  |
| Ziprasidone              | 1                     | 2.3  | 0                 | -    | 1               | 1.1  |

**TABLE S3. Global Assessment of Functioning Scores by Visit for CBD and Placebo Patients (Intention to Treat Analysis Set)**

| Visit                         | Global Assessment of Functioning |       |                      |      |                   |       |                      |      |                      |           |        |
|-------------------------------|----------------------------------|-------|----------------------|------|-------------------|-------|----------------------|------|----------------------|-----------|--------|
|                               | Cannabidiol (n=42)               |       |                      |      | Placebo (n=44)    |       |                      |      | Analysis             |           |        |
|                               | Score                            |       | Change from Baseline |      | Score             |       | Change from Baseline |      | Treatment Difference |           |        |
|                               | Mean                             | SD    | Mean                 | SD   | Mean              | SD    | Mean                 | SD   | Difference           | 95% CI    | p      |
| Visit 1<br>(baseline)         | 53.2                             | 10.53 | NA                   | NA   | 51.7              | 10.60 | NA                   | NA   |                      |           |        |
| Visit 2                       | 55.7 <sup>a</sup>                | 9.27  | 2.4 <sup>a</sup>     | 3.93 | 52.1 <sup>b</sup> | 10.68 | 0.8 <sup>b</sup>     | 2.8  |                      |           |        |
| Visit 3                       | 58.0 <sup>a</sup>                | 9.60  | 4.8 <sup>a</sup>     | 5.92 | 55.1 <sup>c</sup> | 10.06 | 3.9 <sup>c</sup>     | 4.67 |                      |           |        |
| End of treatment <sup>d</sup> | 60.8                             | 11.85 | 7.8                  | 9.48 | 56.7              | 10.62 | 4.8                  | 6.94 | 3.0                  | -0.4, 6.4 | 0.0839 |

<sup>a</sup> n=40; <sup>b</sup> n=43; <sup>c</sup> n=42; <sup>d</sup> Visit 4 or withdrawal

**TABLE S4. Change in BACS Domain Scores by Treatment Group (Intention To Treat Analysis Set)**

| Domain                                     | Range | Cannabidiol              |       |                                         |      | Placebo                  |       |                                         |       | Analysis                |             |       |
|--------------------------------------------|-------|--------------------------|-------|-----------------------------------------|------|--------------------------|-------|-----------------------------------------|-------|-------------------------|-------------|-------|
|                                            |       | Baseline Value<br>(n=42) |       | Change to End<br>of Treatment<br>(n=41) |      | Baseline Value<br>(n=44) |       | Change to End<br>of Treatment<br>(n=44) |       | Treatment<br>Difference | 95% CI      | p     |
|                                            |       | Mean                     | SD    | Mean                                    | SD   | Mean                     | SD    | Mean                                    | SD    |                         |             |       |
| BACS composite score                       | N/A   | 32.21                    | 6.04  | 3.48                                    | 3.03 | 32.91                    | 7.16  | 2.14                                    | 3.44  | 1.31                    | -0.10, 2.72 | 0.068 |
| Verbal memory                              | 0-75  | 34.1                     | 11.29 | 2.1                                     | 6.59 | 36.1                     | 10.21 | 2.0                                     | 6.90  | 0.0                     | -2.9, 2.9   | 0.993 |
| Working memory                             | 0-28  | 15.5                     | 3.95  | 1.9                                     | 3.46 | 15.9                     | 4.61  | 0.8                                     | 3.04  | 1.0                     | -0.3, 2.3   | 0.141 |
| Motor speed                                | 0-100 | 61.5                     | 12.99 | 6.1                                     | 9.82 | 61.0                     | 16.60 | 2.1                                     | 11.74 | 4.2                     | 0.1, 8.3    | 0.044 |
| Verbal fluency                             | > 0   | 31.3                     | 10.63 | 4.6                                     | 6.48 | 35.4                     | 10.72 | 3.7                                     | 6.64  | 0.4                     | -2.5, 3.2   | 0.806 |
| Attention and speed information processing | 0-110 | 37.6                     | 11.44 | 4.2                                     | 6.78 | 35.6                     | 12.73 | 3.7                                     | 8.85  | 0.9                     | -2.4, 4.2   | 0.592 |
| Executive functions                        | 0-22  | 13.3                     | 4.69  | 2.0                                     | 4.07 | 13.4                     | 4.87  | 0.6                                     | 4.45  | 1.4                     | -0.1, 3.0   | 0.068 |

BACS=Brief Assessment of Cognition in Schizophrenia.
